# Supplementary material for: Facile and controllable synthesis of solid Co3V2O8 micro-pencils as a highly efficient anode for Li-ion batteries
Source: Royal Society of Chemistry journal article supplement (doi:10.1039/c7ra03118a), 2017-01-01
Supplement: c7ra03118a1.pdf [file c7ra03118a1.pdf]

## Supporting Information

### Facile and controllable synthesis of solid $\text{Co}_3\text{V}_2\text{O}_8$ micro-pencils as highly efficient anode for Li-ion battery

Jian Yang<sup>#</sup>, Mengqiang Wu<sup>\*</sup>, Feng Gong<sup>##</sup>, Tingting Feng, Cheng Chen, and Jiaxuan Liao

Center for Advanced Electric Energy Technologies (CAEET), School of Energy Science and Engineering, University of Electronic Science and Technology of China, Chengdu 611731, China

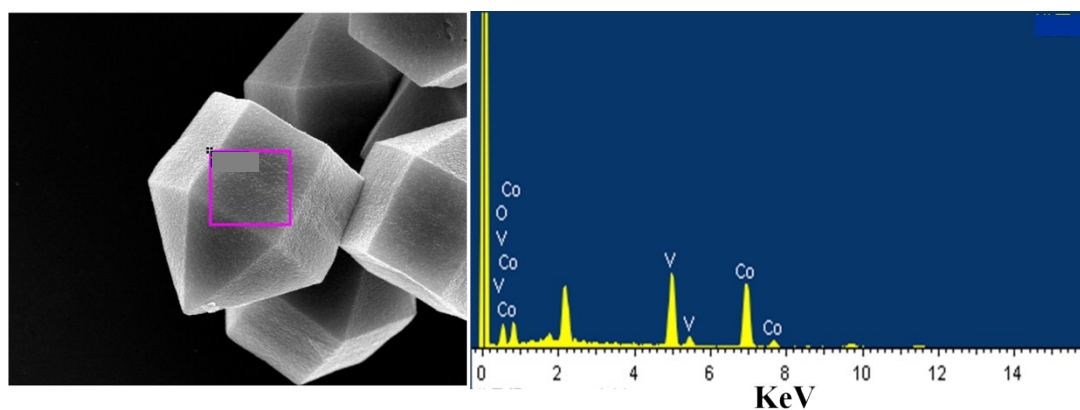

Figure S1. The original EDS test figure and curve of  $\text{Co}_3\text{V}_2\text{O}_8$  micro-pencils.

| Element      | Mass ratio(%) | Atomic ratio(%) |
|--------------|---------------|-----------------|
| O K          | 18.27         | 43.88           |
| V K          | 27.61         | 20.83           |
| Co K         | 54.13         | 35.30           |
| Total amount | 100.00        | 100.00          |

Table S1. Detailed atomic ratio of Co/V.

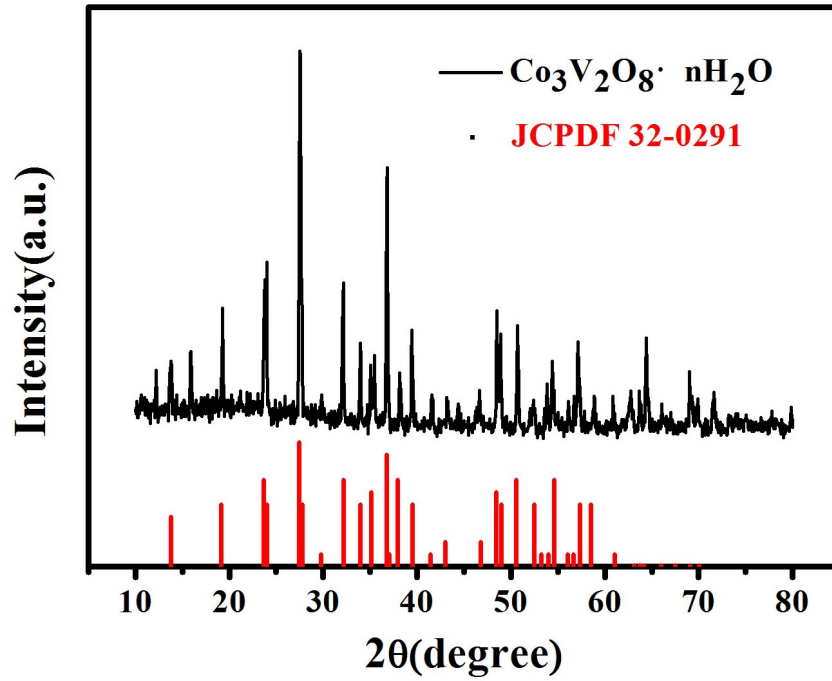

Figure S2. The XRD of  $\text{Co}_3\text{V}_2\text{O}_8$  micro-pencils before annealed.

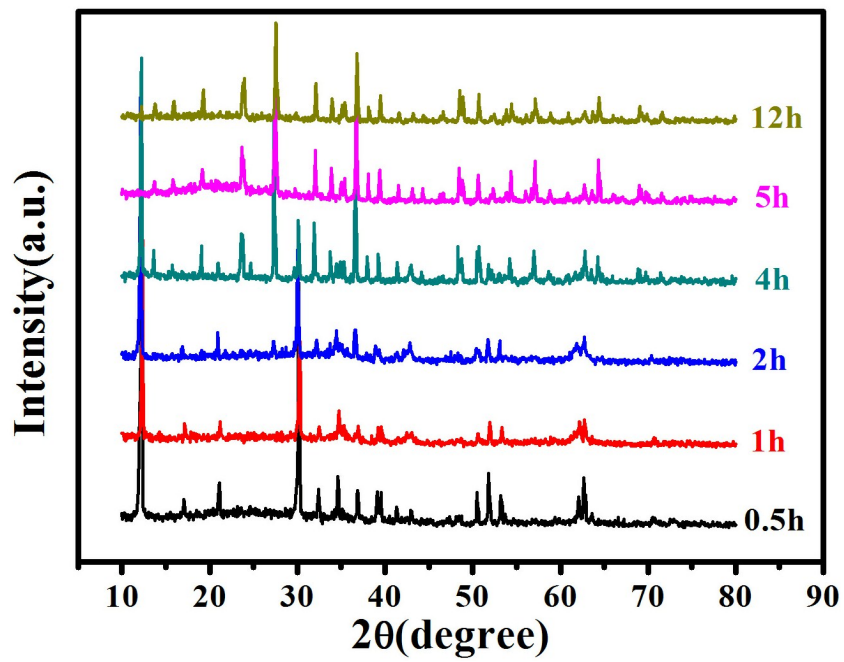

Figure S3. The XRD patterns of the samples collected at different reaction stages.
